# Supplementary material for: A predictive framework for identifying source populations of non-native marine macroalgae: Chondria tumulosa in the Pacific Ocean
Source: PeerJ journal article supplement (doi:10.7717/peerj.19610), 2025-06-23

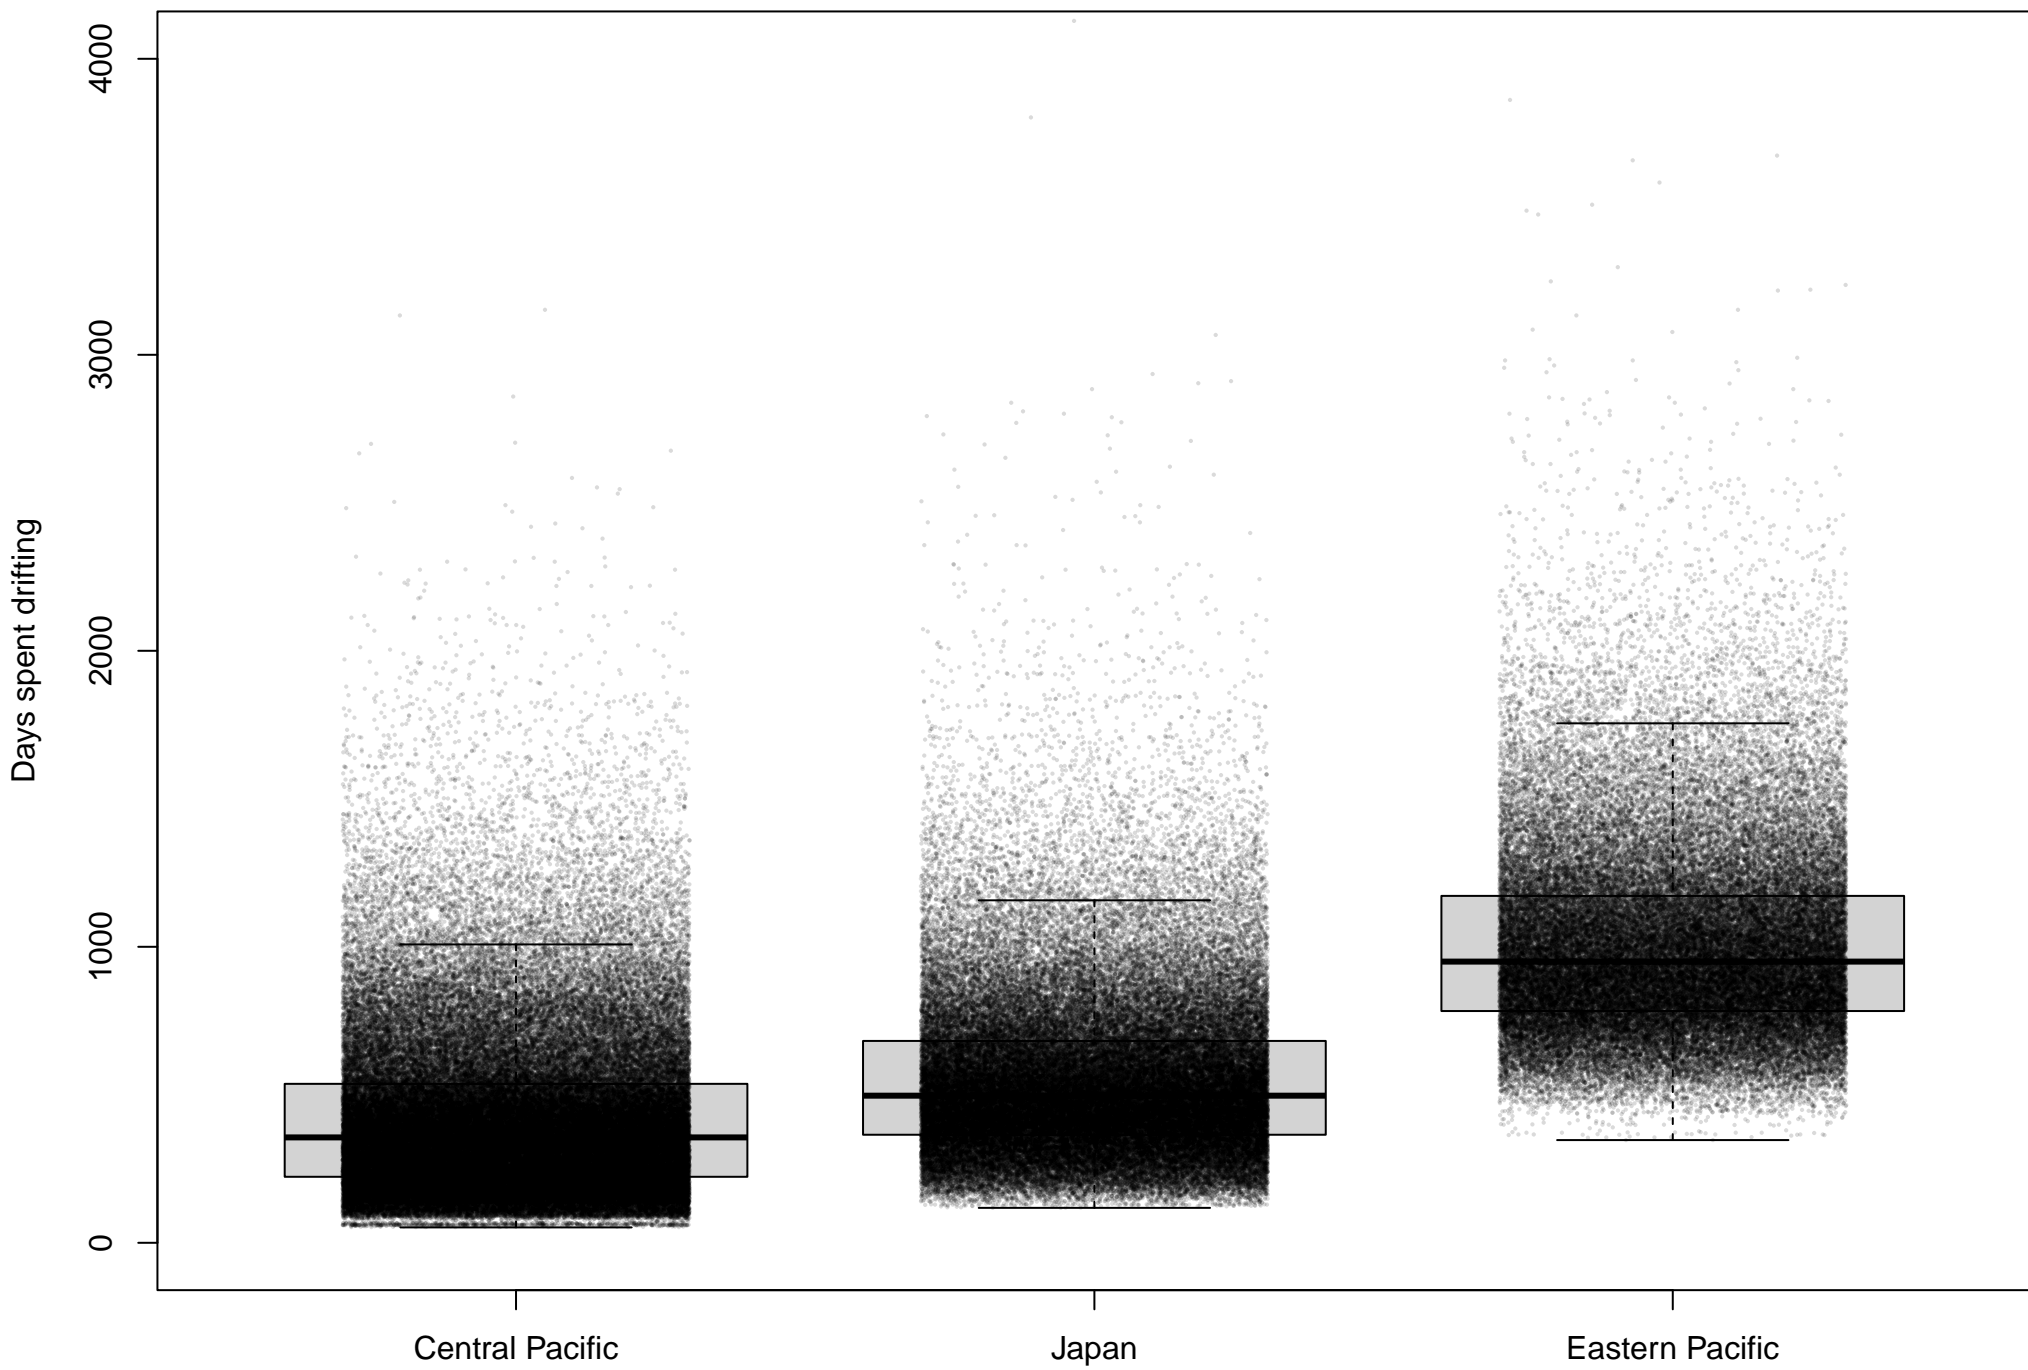

Supplement: FigureS5.pdf [file FigureS5.pdf]
